# Supplementary material
Source: PubMed Central journal article supplement (PMC1523177)

**ZBD dimer**

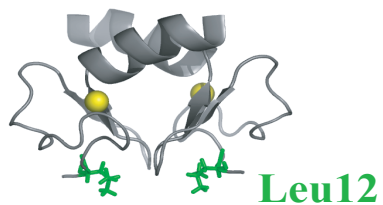

**ZBD hexamer top view**

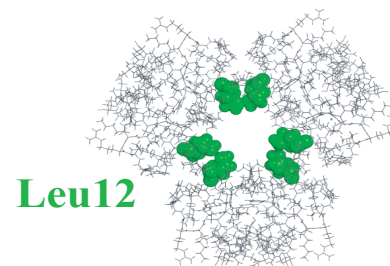

**AAA<sup>+</sup>**

$\alpha\beta\alpha$   
subdomain

all  $\alpha$   
subdomain

**Cys246**

**Cys168**

IGF loop

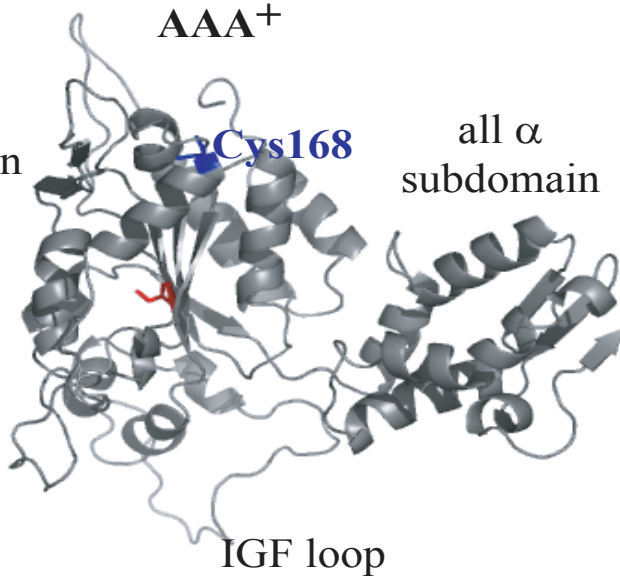

**AAA<sup>+</sup> hexamer side view**

**Cys168**

**Cys246**

IGF loops

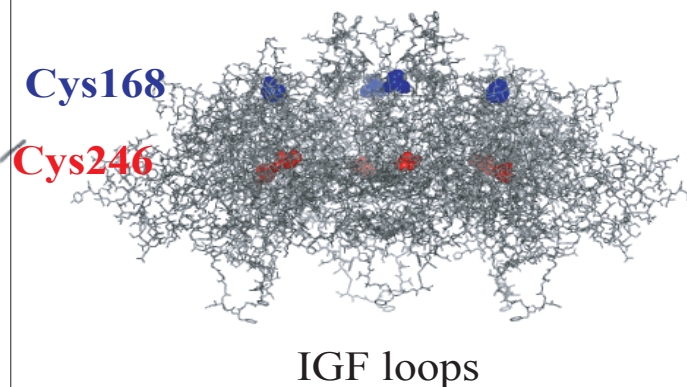

Supplement: 7601223s1.pdf [file 7601223s1.pdf]
